# Supplementary material
Source: Research Square preprint supplement (doi:10.21203/rs.3.rs-9153266/v1)
Supplement: Supplementary file 1 [file 1cb91dc3622dcc46a2069d50.docx]

# Supplementary Materials

### A. Supplementary data T1: Detailed method for refining list of included attributes

Based on a rapid review of the literature on remote health workforce retention (1-9), the authors initially identified a comprehensive range of retention initiatives (also referred to as attributes in the context of the survey questionnaire choices) that could be implemented by remote PHC services. The initial list of 39 potential retention attributes was subsequently reduced to 24 attributes following discussion within team and consultations with experts and remote health care professionals.

This list of 24 attributes was circulated among the five experts, consisting of researchers and health service staff each with over 20 years of experience working in remote Australia. Each expert was asked to rank these attributes based on their perceived importance (where 1: less important, 2: important and 3: highly important). The scores from five experts were equally weighted and aggregated and attributes with the lowest cumulative scores were either removed or (where appropriate) merged with similar attributes. When attributes had the same score, an agreement was reached through expert consensus. This process resulted in a final list of 20 attributes for inclusion in the final survey instrument (See Table S1 below).

Supplementary data Table S1: Attributes and descriptions

| **Attributes and descriptions** |
| --- |
| 1. **Professional support [8]**  - Provide a better rostering model and supports (eg. transport) to allow staff rotations in and out of community - Improve role recognition and clarity (including offering me a role that fits with my skills and interests) - Reduce overtime/on-call demands - Increase First Nations leadership (including in shared leadership roles) - Improve human resources support, including having policies and processes in place to support ongoing employment arrangements - Recognise and celebrate staff achievements and skills - Offer additional annual leave and flexible time-off if needed (eg. family emergencies) - Increase capabilities of onsite manager (eg. communicates well, knowledge of, and respect for, remote Indigenous context) |
| 1. **Culture [3]**  - Increase training and mentoring by local First Nations people - Ensure more on-Country training (no travelling) for First Nations staff tailored to their training needs - Provide employment to a sufficient number of local community members |
| 1. **Education (Professional development support) [3]**  - Provide more professional mentoring appropriate to my needs - Increase opportunities for promotion and/or career advancement - Increase access and support for training courses and higher education or engagement in research (eg. paid courses, quarantined time) |
| 1. **Financial incentives [3]**  - Increase retention bonus for every 12 months of fulltime service completed (eg. by $10,000 after 12 months work) - Increase subsidies for costs of living (eg. extra $2,500 per year for housing, electricity, childcare fees, school fees, airfares etc.) - Increase my salary/income (by an extra $5,000 per year) |
| 1. **Personal support [3]**  - Provide employment or other opportunities for family members (eg. spouse) - Increase coordination support for personal logistics (eg. online grocery orders) - Increase support networks, including embedded emotional wellbeing and debriefing, and engagement with the local community |

### B. Supplementary data T2: Count data analysis

Count data analysis was applied to examine the choice frequencies. Standardized scores were calculated to rank the workforce retention initiatives from most-preferred to least-preferred using the following equation:

Where = total number of times each retention intervention was most preferred; total number of times each intervention was least preferred; n = number of respondents; and r = the frequency of the appearance of each retention initiative in the overall full design across all blocks. The standardized score indicates the relative strength of influence and hierarchy of attributes or salience of an attribute across all healthcare workers in the sample (10). To enhance interpretability, we transformed standardized scores into a 0-100 preference score, where 0 indicates least preferred and 100 indicates most preferred initiatives.

Table S2 below shows the BWS survey results for all respondents. *Retention bonus for every 12 months of service* was rated as the most preferred retention initiatives (mean Best Worst (BW) preference score: 100). The preferences were followed by *offer annual leave and flexible time-off* (mean BW preference score: 89), *support for training, higher education or research* (mean, BWS score:78), increased *First Nations leadership* (mean BW preference score: 72), and ensuring there are *support networks and staff wellbeing engagement* (mean BW score: 70). The *support for family employment opportunities* (mean BW preference score: 0)was the least preferred retention initiative**.** See Table S2 below shows B, W, BW score, mean BW score, mean standard BW score, exposure, order and preference score for details.

The overall BWS count data analysis revealed that remote PHC staff strongly valued financial/monetary initiatives such as *retention bonuses, salary/income increments,* and *subsidies for living cost*. Several non-financial initiatives consisting of *offering increased annual leave and more flexible time off, increased training, higher education or research support, supporting networks development and wellbeing engagement, focusing on development of First Nations leadership in the remote health services* were also highly valued. These findings were consistent with those from the conditional logit modelling.

Supplementary data Table S2: Overall count data for respondents’ preferences

| Attributes | B | W | BW Score | Mean  Standardized BW Score | Mean SD BW Score | Exposure | Mean standardized BW preference score | Order |
| --- | --- | --- | --- | --- | --- | --- | --- | --- |
| Retention bonus for every 12 months of service | 202 | 60 | 142 | 0.35 | 0.63 | 456 | 100 | 1 |
| Offer annual leave and flexible time-off (e.g., emergencies) | 184 | 73 | 111 | 0.27 | 0.60 | 456 | 89 | 2 |
| Support for training, higher education or research | 163 | 73 | 90 | 0.19 | 0.54 | 464 | 78 | 3 |
| Increase First Nations leadership | 123 | 88 | 35 | 0.15 | 0.64 | 452 | 72 | 4 |
| Increase support networks and wellbeing engagement | 150 | 96 | 54 | 0.13 | 0.62 | 459 | 70 | 5 |
| Increase my salary/income (e.g., $5,000 extra) | 145 | 83 | 62 | 0.12 | 0.60 | 455 | 68 | 6 |
| Subsidies for living costs (housing, school, airfares etc.) | 116 | 112 | 4 | 0.08 | 0.67 | 461 | 63 | 7 |
| Increase capabilities of onsite manager | 106 | 89 | 17 | 0.04 | 0.56 | 453 | 58 | 8 |
| Better rostering and support to allow staff rotation | 124 | 112 | 12 | 0.03 | 0.62 | 453 | 57 | 9 |
| Increase training and mentoring by local First Nations people | 134 | 99 | 35 | 0.02 | 0.61 | 459 | 56 | 10 |
| Ensure more on-Country training for First Nations staff | 98 | 101 | -3 | -0.01 | 0.60 | 453 | 51 | 11 |
| Recognise and celebrate staff achievements | 103 | 118 | -15 | -0.01 | 0.61 | 456 | 50 | 12 |
| Improve HR support, including policies and processes | 90 | 122 | -32 | -0.02 | 0.61 | 463 | 49 | 13 |
| Provide more professional mentoring appropriate to my needs | 91 | 115 | -24 | -0.02 | 0.60 | 458 | 49 | 14 |
| Provide employment to local community members | 92 | 120 | -28 | -0.03 | 0.57 | 457 | 48 | 15 |
| Improve role recognition and clarity | 93 | 111 | -18 | -0.04 | 0.53 | 447 | 47 | 16 |
| Increase opportunities for promotion and/or advancement | 73 | 117 | -44 | -0.09 | 0.52 | 455 | 40 | 17 |
| Reduce overtime/on-call demands | 81 | 154 | -73 | -0.15 | 0.61 | 455 | 32 | 18 |
| Coordination support for logistics (e.g., groceries) | 57 | 204 | -147 | -0.29 | 0.62 | 447 | 13 | 19 |
| Support for family employment opportunities | 55 | 233 | -178 | -0.38 | 0.64 | 461 | 0 | 20 |

Note: B - best score; BW - best-worst; SD – standard deviation; W – worst score

### C. Supplementary data T2: Conditional logit modelling

#### Overall Preference scores

Supplementary data Table S3: Overall preference score (conditional logit model)

| **Retention initiatives (n =228)** | **β coeff** | **Preference score** | **(95% CI)** | **Rank** |
| --- | --- | --- | --- | --- |
| Retention bonus for every 12 months of service | 1.75** | 100 | (75.5, 125.5) | 1 |
| Offer annual leave and flexible time-off (e.g., emergencies) | 1.55** | 88 | (65.7, 110.3) | 2 |
| Support for training, higher education or research | 1.40** | 79 | (57.7, 100.3) | 3 |
| Increase support networks and wellbeing engagement | 1.26** | 71 | (47.9, 94.1) | 4 |
| Increase my salary/income (e.g., $5,000 extra) | 1.21** | 68 | (43.9, 92.1) | 5 |
| Increase training and mentoring by local First Nations people | 1.17** | 66 | (43.1, 88.9) | 6 |
| Better rostering and support to allow staff rotation | 1.01** | 57 | (34.2, 79.8) | 7 |
| Subsidies for living costs (housing, school, airfares etc.) | 1.01** | 56 | (32.6, 79.4) | 8 |
| Increase First Nations leadership | 0.98** | 55 | (32.1, 77.9) | 9 |
| Increase capabilities of onsite manager | 0.82** | 45 | (20.4, 69.6) | 10 |
| Recognise and celebrate staff achievements | 0.74** | 41 | (18.6, 63.4) | 11 |
| Improve role recognition and clarity | 0.71** | 38 | (13.2, 62.8) | 12 |
| Provide more professional mentoring appropriate to my needs | 0.63** | 34 | (11.1, 56.9) | 13 |
| Ensure more on-Country training for First Nations staff | 0.62** | 33 | (10.3, 55.7) | 14 |
| Improve HR support, including policies and processes | 0.62** | 33 | (9.0, 57.0) | 15 |
| Provide employment to local community members | 0.59** | 31 | (8.6, 53.4) | 16 |
| Reduce overtime/on-call demands | 0.48 | 25 | (-1.4, 51.4) | 17 |
| Increase opportunities for promotion and/or advancement | 0.40 | 20 | (-3.7, 43.7) | 18 |
| Coordination support for logistics (e.g., groceries) | 0.05 | 0 | (-25.5, 25.5) | 19 |
| Support for family employment opportunities (ref) | Reference |  |  |  |

** p<.01, * p<.05, CI: confidence interval, β coeff: β coefficients

#### Preference scores by indigenous status

Supplementary data Table S4: Participant preferences by Indigenous status

|  | **Non-Indigenous staff (n=180)** | | | | **First Nations staff (n= 48)** | | | |
| --- | --- | --- | --- | --- | --- | --- | --- | --- |
| **Attributes** | **β coeff** | **Preference score** | **(95% CI)** | **Rank** | **β coeff** | **Preference score** | **(95% CI)** | **Rank** |
| Retention bonus for every 12 months of service | 2.13** | 100 | (73.5, 126.5) | 1 | 0.43 | 82 | (51.4, 112.6) | 10 |
| Offer annual leave and flexible time-off (e.g., emergencies) | 1.81** | 82 | (57.0, 107) | 2 | 0.76* | 94 | (68.9, 119.1) | 4 |
| Support for training, higher education or research | 1.67** | 75 | (51.3, 98.7) | 3 | 0.57 | 87 | (62.4, 111.6) | 6 |
| Increase my salary/income (e.g., $5,000 extra) | 1.48** | 65 | (38.2, 91.8) | 4 | 0.35 | 79 | (50.4, 107.6) | 12 |
| Increase support networks and wellbeing engagement | 1.41** | 61 | (34.2, 87.8) | 5 | 0.82* | 96 | (73.2, 118.8) | 3 |
| Better rostering and support to allow staff rotation | 1.33** | 56 | (30.4, 81.6) | 6 | -0.09 | 64 | (38.5, 89.5) | 16 |
| Increase training and mentoring by local First Nations people | 1.31** | 55 | (28.0, 82) | 7 | 0.84** | 97 | (76.5, 117.5) | 2 |
| Subsidies for living costs (housing, school, airfares etc.) | 1.20** | 49 | (23.7, 74.3) | 8 | 0.49 | 85 | (54.3, 115.7) | 8 |
| Increase capabilities of onsite manager | 1.09** | 43 | (16.3, 69.7) | 9 | -0.05 | 66 | (34.9, 97.1) | 15 |
| Increase First Nations leadership | 1.02** | 39 | (12.5, 65.5) | 10 | 0.93* | 100 | (75.3, 124.7) | 1 |
| Provide more professional mentoring appropriate to my needs | 0.88** | 32 | (7.4, 56.6) | 11 | -0.26 | 58 | (29.2, 86.8) | 17 |
| Improve role recognition and clarity | 0.85** | 30 | (2.1, 57.9) | 12 | 0.33* | 79 | (50.7, 107.3) | 11 |
| Reduce overtime/on-call demands | 0.86** | 30 | (1.6, 58.4) | 13 | -1.19* | 25 | (-15.0, 65) | 18 |
| Recognise and celebrate staff achievements | 0.84** | 29 | (3.0, 55.0) | 14 | 0.52 | 86 | (63.5, 108.5) | 7 |
| Improve HR support, including policies and processes | 0.82** | 28 | (2.0, 54) | 15 | 0.05* | 69 | (37.8, 102.2) | 14 |
| Ensure more on-Country training for First Nations staff | 0.70** | 22 | (-4.0, 48) | 16 | 0.44 | 83 | (58.3, 107.7) | 9 |
| Provide employment to local community members | 0.71** | 22 | (-3.0, 47) | 17 | 0.28 | 77 | (51.3, 102.7) | 13 |
| Coordination support for logistics (e.g., groceries) | 0.44 | 8 | (-18.9, 34.9) | 18 | -1.19* | 25 | (-15.0, 65) | 19 |
| Increase opportunities for promotion and/or advancement | 0.30 | 0 | (-28.2, 19) | 19 | 0.55 | 87 | (63.6, 110.4) | 5 |
| Support for family employment opportunities (ref) | Reference |  |  |  |  |  |  |  |

Note: ** P<0.01, * P<0.05, CI-confidence intervals, β coeff: β coefficients

#### Preference scores by professional category

Supplementary Table data S5: Participant preferences by professional category

|  | **Clinical staff (n= 181)** | | | | **Non-clinical staff (n= 47)** | | | |
| --- | --- | --- | --- | --- | --- | --- | --- | --- |
| **Attributes** | **β coeff** | **Preference score** | **95% CI** | **Rank** | **β coeff** | **Preference**  **score** | **95% ci** | **Rank** |
| Retention bonus for every 12 months of service | 1.86** | 100 | (73.4,126.6) | 1 | 1.40* | 86 | (42.4,129) | 6 |
| Offer annual leave and flexible time-off (e.g., emergencies) | 1.50** | 79 | (54.1, 103) | 2 | 1.73** | 100 | (63.2, 136) | 1 |
| Support for training, higher education or research | 1.40** | 73 | (48.8, 97.2) | 3 | 1.40** | 86 | (54. 118) | 5 |
| Increase support networks and wellbeing engagement | 1.20** | 61 | (34.7, 87.3) | 4 | 1.47** | 89 | (56.3, 121) | 3 |
| Increase my salary/income (e.g., $5,000 extra) | 1.16** | 59 | (32.1, 85.9) | 5 | 1.46** | 89 | (49.1, 129) | 2 |
| Better rostering and support to allow staff rotation | 1.17** | 59 | (33.6, 84.4) | 6 | 0.23 | 37 | (1.7, 72.3) | 17 |
| Increase training and mentoring by local First Nations people | 1.17** | 59 | (33.3, 84.7) | 7 | 1.20** | 78 | (42.8, 113) | 11 |
| Subsidies for living costs (housing, school, airfares etc.) | 0.92** | 45 | (19.7, 70.3) | 8 | 1.33* | 83 | (40.3, 125) | 7 |
| Increase First Nations leadership | 0.91** | 44 | (18.5, 69.5) | 9 | 1.30** | 82 | (44.8, 119) | 8 |
| Increase capabilities of onsite manager | 0.79** | 37 | (9.6, 64.4) | 10 | 0.99* | 69 | (28.8, 109) | 13 |
| Recognise and celebrate staff achievements | 0.63** | 28 | (2.8, 53.2) | 11 | 1.22** | 78 | (42.6, 113) | 9 |
| Provide more professional mentoring appropriate to my needs | 0.59* | 25 | (0.1, 49.9) | 12 | 0.78 | 60 | (18.4, 101) | 14 |
| Improve role recognition and clarity | 0.56* | 24 | (-3.7, 51.7) | 13 | 1.21* | 78 | (37.2, 118 | 10 |
| Reduce overtime/on-call demands | 0.57* | 24 | (-5.2, 59.2) | 14 | -0.12 | 22 | (-22.7, 66) | 18 |
| Provide employment to local community members | 0.55* | 23 | (-1.9, 47.5) | 15 | 0.77 | 60 | (23.1, 97) | 15 |
| Ensure more on-Country training for First Nations staff | 0.49* | 20 | (-5.3, 45.3) | 16 | 1.11* | 74 | (36.3, 111) | 12 |
| Improve HR support, including policies and processes | 0.39 | 13 | (-13.3, 39.3) | 17 | 1.45** | 88 | (47.8, 128) | 4 |
| Increase opportunities for promotion and/or advancement | 0.32 | 9 | (-17.5, 35.5) | 18 | 0.74 | 58 | (21.3, 94) | 16 |
| Coordination support for logistics (e.g., groceries) | 0.16 | 0 | (-27.6, 27.5) | 19 | -0.65 | 0 | (-54.2, 54) | 19 |
| Support for family employment opportunities (ref) | Reference |  |  |  |  |  |  |  |

** p<.01, * p<.05, CI- confidence intervals, β coeff: β coefficients

#### Preference scores by community population size

Among staff who practised in large remote communities (>1000 people), the five most preferred retention initiatives were, in order (highest score first):Retention bonus for every 12 months of service;Offer annual leave and flexible time-off; Subsidies for living costs (housing, school, airfares etc.);Increase training and mentoring by local First Nations people; and Increase support networks and wellbeing engagement.

For staff from small communities, the five most preferred retention initiatives were: Increase training, higher education or research support; Retention bonus for every 12 months of service; Better rostering and support to allow staff rotation; Offer annual leave and flexible time-off; and Increased salary/income (e.g. $5000 extra).

Only two retention initiatives: Retention bonus for every 12 months of service; and Offer annual leave and flexible time-off, were in the top five for both large and small community population size.

However, for any single retention initiative, the confidence interval for preference scores for respondents from large and small community population sizes overlapped, indicating no statistical significance by community size in staff preferences regarding that retention initiative.

Supplementary data Figure S1: Preference scores for retention initiatives based on community population size

Supplementary data Table S6: Participant preferences by community population size

|  | **Large community (n = 114)** | | | | **Small community (n= 114)** | | | |
| --- | --- | --- | --- | --- | --- | --- | --- | --- |
| **Attributes** | **β coeff** | **Preference score** | **(95% CI** | **Rank** | **β coeff** | **Preference score** | **95% CI** | **Rank** |
| Retention bonus for every 12 months of service | 2.44** | 100 | (75.9, 124.1) | 1 | 1.13** | 96 | (49.8, 144.2) | 2 |
| Offer annual leave and flexible time-off (e.g., emergencies) | 2.28** | 94 | (71.9, 116.1) | 2 | 0.90** | 76 | (33.6, 118.4) | 4 |
| Subsidies for living costs (housing, school, airfares etc.) | 1.79** | 75 | (51.8, 98.2) | 3 | 0.26 | 21 | (-24.1, 66.1) | 14 |
| Increase training and mentoring by local First Nations people | 1.77** | 74 | (50.7, 97.3) | 4 | 0.63* | 54 | (13.1, 98.9) | 8 |
| Increase support networks and wellbeing engagement | 1.74** | 73 | (50.9, 97.1) | 5 | 0.85** | 73 | (27.4, 114.6) | 6 |
| Support for training, higher education or research | 1.73** | 72 | (50.4, 93.6) | 6 | 1.18** | 100 | (58.9, 114.1) | 1 |
| Increase my salary/income (e.g., $5,000 extra) | 1.63** | 69 | (45.5, 94.5) | 7 | 0.87** | 74 | (27.9, 118.1) | 5 |
| Increase capabilities of onsite manager | 1.42** | 60 | (37.0, 87) | 8 | 0.27 | 29 | (-19.3, 71.3) | 12 |
| Improve role recognition and clarity | 1.39** | 58 | (35.3, 82.7) | 9 | 0.12 | 9 | (-41.2, 59.2) | 17 |
| Increase First Nations leadership | 1.35** | 58 | (33.1, 80.9) | 10 | 0.73** | 63 | (24.1, 107.9) | 7 |
| Improve HR support, including policies and processes | 1.12** | 49 | (26.1, 75.9) | 11 | 0.19 | 15 | (-29.4, 59.4) | 16 |
| Provide more professional mentoring appropriate to my needs | 1.14** | 49 | (26.1, 73.9) | 12 | 0.27 | 21 | (-21.6, 63.6) | 13 |
| Provide employment to local community members | 1.10** | 48 | (28.3, 71.7) | 13 | 0.07 | 5 | (-38.0, 48) | 18 |
| Recognise and celebrate staff achievements | 1.06** | 47 | (23.9, 74.1) | 14 | 0.54* | 46 | (4.8, 83.2) | 10 |
| Ensure more on-Country training for First Nations staff | 1.07** | 47 | (23.2, 70.8) | 15 | 0.33 | 28 | (-14.1, 68.1) | 11 |
| Better rostering and support to allow staff rotation | 0.97** | 43 | (20.1, 67.9) | 16 | 1.02** | 87 | (42.2, 127.8) | 3 |
| Increase opportunities for promotion and/or advancement | 0.90* | 40 | (16.3, 67.7) | 17 | 0.01 | 0 | (-41.9, 41.9) | 19 |
| Reduce overtime/on-call demands | 0.21 | 14 | (-15.1, 39.1) | 18 | 0.54* | 47 | (-1.5, 97,5) | 9 |
| Coordination support for logistics (e.g., groceries) | -0.13 | 0 | (-27.3, 27.3) | 19 | 0.24 | 19 | (-27.0, 65) | 15 |
| Support for family employment opportunities (ref) | Reference |  |  |  |  |  |  |  |

** p<.01, * p<.05, CI: confidence interval, β coeff: β coefficients

#### Preference scores by career stage

Mid-career respondents most preferred:Retention bonuses for every 12 months of service; Offers of annual leave and flexible time-off; Support for training, higher education or research; Increase to salary/ income; Increase support networks and wellbeing engagement. Late-career respondents had very similar preferences to mid-career respondents, though Better rostering and support to allow staff rotation was their third most preferred retention initiative, whereas it ranked 10th for mid-career staff.

Early-career respondents most strongly preferred: Support for training, higher education or research; Increased support networks and wellbeing engagement; Increased training and mentoring by local First Nations people; Offers of annual leave and flexible time-off; and Increased First Nations leadership.

Only two retention initiatives were in the top five for early, mid and late career respondents: Support for training, higher education or research; and Offering annual leave and flexible time-off. Both mid and late career respondents ranked Retention bonusesfor every 12 months of serviceas the most important retention initiative,but this was ranked 7th by early-career respondents. Least preferred retention initiatives also differed by career stage, with early-career respondents least preferring Reduced overtime/on-call demands, whereas mid-career respondents least preferred Support for family employment opportunities and late-career respondents least preferred Increased opportunities for promotion and/or advancement. For any single retention initiative, the confidence interval of early- mid- and late-career respondents’ preference scores overlapped, indicating no statistically significant difference by career stage in preferences regarding that retention initiative.

Supplementary data Figure S2: Preference scores for retention initiatives based on career stage

Supplementary data Table S7: Participant preferences by career stage

|  | **Early career(n = 33)** | | | **Mid-career (n = 121)** | | | **Late career (n = 74)** | | |
| --- | --- | --- | --- | --- | --- | --- | --- | --- | --- |
| **Attributes** | **β coeff** | **Preference score** | **Rank** | **β coeff** | **Preference score** | **Rank** | **β coeff** | **Preference score** | **Rank** |
| Support for training, higher education or research | 1.29** | 100 | 1 | 1.68** | 74 | 3 | 1.11** | 82 | 4 |
| Increase support networks and wellbeing engagement | 1.10* | 90 | 2 | 1.54** | 67 | 5 | 0.96* | 76 | 6 |
| Increase training and mentoring by local First Nations people | 1.10* | 90 | 3 | 1.52** | 65 | 6 | 0.75* | 67 | 9 |
| Offer annual leave and flexible time-off (e.g., emergencies) | 1.06* | 88 | 4 | 1.93** | 86 | 2 | 1.25** | 88 | 2 |
| Increase First Nations leadership | 1.05* | 87 | 5 | 1.24** | 52 | 8 | 0.57 | 60 | 12 |
| Increase capabilities of onsite manager | 0.80 | 74 | 6 | 0.80* | 29 | 16 | 0.89* | 73 | 7 |
| Retention bonus for every 12 months of service | 0.78 | 73 | 7 | 2.20** | 100 | 1 | 1.54** | 100 | 1 |
| Recognise and celebrate staff achievements | 0.71 | 69 | 8 | 1.01** | 40 | 12 | 0.40 | 52 | 16 |
| Better rostering and support to allow staff rotation | 0.55 | 60 | 9 | 1.05** | 42 | 10 | 1.24** | 87 | 3 |
| Provide more professional mentoring appropriate to my needs | 0.50 | 58 | 10 | 0.85* | 32 | 13 | 0.41 | 53 | 15 |
| Ensure more on-Country training for First Nations staff | 0.31 | 48 | 11 | 0.82** | 30 | 15 | 0.53 | 58 | 13 |
| Subsidies for living costs (housing, school, airfares etc.) | 0.25 | 45 | 12 | 1.41** | 60 | 7 | 0.79* | 69 | 8 |
| Increase my salary/income (e.g., $5,000 extra) | 0.22 | 43 | 13 | 1.61** | 70 | 4 | 1.09** | 81 | 5 |
| Improve role recognition and clarity | 0.17 | 40 | 14 | 1.23** | 51 | 9 | 0.09 | 40 | 17 |
| Provide employment to local community members | 0.09 | 36 | 15 | 0.84** | 31 | 14 | 0.53 | 58 | 14 |
| Increase opportunities for promotion and/or advancement | 0.10 | 36 | 16 | 1.06** | 42 | 11 | -0.86* | 0 | 19 |
| Improve HR support, including policies and processes | -0.23 | 19 | 17 | 0.78* | 28 | 17 | 0.74* | 66 | 11 |
| Coordination support for logistics (e.g., groceries) | -0.49 | 5 | 18 | 0.22 | 0 | 19 | 0.11 | 40 | 18 |
| Reduce overtime/on-call demands | -0.58 | 0 | 19 | 0.56 | 17 | 18 | 0.75* | 67 | 10 |
| Support for family employment opportunities | Reference |  |  |  |  |  |  |  |  |

** p<.01, * p<.05, CI: confidence interval, β coeff: β coefficients

#### Preference scores by employment arrangements

Among contracted PHC staff, the top five most preferred initiatives were Retention bonus for every 12 months of service; Offer annual leave and flexible time-off; Support for training, higher education or research; Increased salary/income; and Increase support networks and wellbeing engagement.

Temporary PHC staff respondents (agency, locum tenens and casual) most preferred: Better rostering and support to allow staff rotation; Support for training, higher education or research; Retention bonus for every 12 months of service; Increased support networks and wellbeing engagement; and Increased training and mentoring by local First Nations people.

For all single retention initiatives, the confidence interval of contracted and temporary respondents’ preference scores overlapped, indicating no statistically significant difference by employment arrangements in preferences.

Supplementary data Figure S3: Preference scores for retention initiatives based on employment arrangements

Supplementary data Table S8: Participant preferences by employment arrangements

|  | **Permanent (n= 144)** | | | | **Others (n= 84)** | | | |
| --- | --- | --- | --- | --- | --- | --- | --- | --- |
| **Attributes** | **β coeff** | **Preference score** | **95% confidence interval** | **Rank** | **β coeff** | **Preference score** | **95% confidence interval** | **Rank** |
| Retention bonus for every 12 months of service | 2.26** | 100 | (77.0,122) | 1 | 1.02** | 88 | (31.9, 145.1) | 3 |
| Offer annual leave and flexible time-off (e.g., emergencies) | 2.11** | 93 | (70.6, 115.4) | 2 | 0.72** | 63 | (8.5.0, 117) | 6 |
| Support for training, higher education or research | 1.62** | 71 | (48.7, 93.3) | 3 | 1.11** | 95 | (45, 145.2) | 2 |
| Increase my salary/income (e.g., $5,000 extra) | 1.60** | 70 | (46.7, 93.3) | 4 | 0.71* | 62 | (14.2, 117.8) | 7 |
| Increase support networks and wellbeing engagement | 1.57** | 69 | (46.0, 91) | 5 | 0.85** | 73 | (23, 123) | 4 |
| Subsidies for living costs (housing, school, airfares etc.) | 1.48** | 65 | (42.2, 87.2) | 6 | 0.23 | 23 | (-23.1, 79.1) | 14 |
| Increase training and mentoring by local First Nations people | 1.44** | 63 | (39.6, 86.4) | 7 | 0.84** | 73 | (23.1, 122.1) | 5 |
| Increase First Nations leadership | 1.28** | 56 | (32.4, 79.6) | 8 | 0.60* | 53 | (5.3, 100.7) | 8 |
| Increase capabilities of onsite manager | 1.24** | 54 | (30.8, 77.2) | 9 | 0.33 | 32 | (-16.5, 94.5) | 10 |
| Recognise and celebrate staff achievements | 1.11** | 48 | (24.2, 71.8) | 10 | 0.27 | 26 | (-14.3, 74.3) | 12 |
| Improve role recognition and clarity | 1.08** | 47 | (24.4, 69) | 11 | 0.18 | 20 | (-30.7, 80.7) | 16 |
| Provide more professional mentoring appropriate to my needs | 1.07** | 46 | (22.1, 69.9) | 12 | 0.04 | 8 | (-32.3, 66.3) | 18 |
| Improve HR support, including policies and processes | 0.97** | 42 | (17.5, 66.5) | 13 | 0.25 | 25 | (-21.0, 79) | 13 |
| Provide employment to local community members | 0.93** | 40 | (16.5, 63.5) | 14 | 0.22 | 23 | (-21.5, 75.5) | 15 |
| Better rostering and support to allow staff rotation | 0.88** | 38 | (15, 60.5) | 15 | 1.17** | 100 | (54.7, 155.3) | 1 |
| Ensure more on-Country training for First Nations staff | 0.81* | 35 | (10.2, 59.8) | 16 | 0.42 | 39 | (-3.3, 83.3) | 9 |
| Increase opportunities for promotion and/or advancement | 0.75* | 32 | (7.8, 56.2) | 17 | -0.05 | 0 | (-48.5, 48.5) | 19 |
| Reduce overtime/on-call demands | 0.63* | 27 | (1.6, 52.6) | 18 | 0.29 | 29 | (-26.5, 88.5) | 11 |
| Coordination support for logistics (e.g., groceries) | 0.04 | 0 | (-26.0, 26) | 19 | 0.13 | 15 | (-28.7, 74.7) | 17 |
| Support for family employment opportunities (ref) | Reference |  |  |  |  |  |  |  |

** p<.01, * p<.05, CI: confidence interval, β coeff: β coefficients

#### Preference scores by governance of PHC service

For staff working for ATSICCHSs, Retention bonuses for every 12 months of service were strongly preferred (100), with the average preference score 14 points higher than for the next preferred retention initiative of Offering annual leave and flexible time-off (86) (see supplementary data Figure 4 and Table 6 below).

For staff working in other non-ATSICCHS settings, Retention bonuses for every 12 months of service (99) were slightly less preferred than the most preferred retention initiative which was Support for training, higher education or research (100).

Staff at ATSICCHSs tended to more strongly prefer Increased training and mentoring by local First Nations people (ranked 3rd) whereas for staff at non-ATSICCHSs it was only ranked 12th. Staff at non-ATSICCHSs tended to more strongly prefer Better rostering and support to allow staff rotation (ranked 4th) whereas for staff at ATSICCHSs it was ranked 10th. Despite these differences, for any single retention initiative, the confidence interval for preference scores for respondents from ATSICCHSs and non-ATSICCHSs overlapped, indicating no statistical significance by governance of the service in staff preferences regarding that retention initiative.

Supplementary data Figure S4: Preference scores for retention initiatives based on governance of PHC service

Supplementary data Table S9: Participant preferences by governance of PHC service

|  | **ATSICCHOS staff (n =162)** | | | | **Other staff (n = 66)** | | | |
| --- | --- | --- | --- | --- | --- | --- | --- | --- |
| **Attributes** | **β coeff** | **Preference score** | **95% CI** | **Rank** | **β coeff** | **Preference score** | **95%CI** | **Rank** |
| Retention bonus for every 12 months of service | 2.02** | 100 | (68.5,131.5) | 1 | 1.29** | 99 | (61.9, 136.1) | 2 |
| Offer annual leave and flexible time-off (e.g., emergencies) | 1.80** | 86 | (56.8, 115) | 2 | 1.12** | 90 | (58.2, 121.8) | 3 |
| Increase training and mentoring by local First Nations people | 1.63** | 76 | (48.3, 103) | 3 | 0.11 | 38 | (0.3, 75.7) | 12 |
| Increase support networks and wellbeing engagement | 1.48** | 67 | (39.2, 94.8) | 4 | 0.87* | 77 | (37.9, 116.1) | 5 |
| Support for training, higher education or research | 1.49** | 67 | (39.3, 94.7) | 5 | 1.32** | 100 | (66.8,133.2) | 1 |
| Increase First Nations leadership | 1.47** | 66 | (38.2, 93.8) | 6 | -0.15 | 25 | (-13, 63) | 14 |
| Increase my salary/income (e.g., $5,000 extra) | 1.45** | 65 | (34.8, 95.2) | 7 | 0.81* | 74 | (37.1, 111) | 6 |
| Subsidies for living costs (housing, school, airfares etc.) | 1.22** | 51 | (20.5, 81.5) | 8 | 0.67 | 67 | (31.7, 102.3) | 7 |
| Improve role recognition and clarity | 1.12** | 45 | (14, 76) | 9 | -0.21 | 22 | (-15.1, 59.1) | 15 |
| Better rostering and support to allow staff rotation | 1.13** | 45 | (13.8, 76.2) | 10 | 0.87* | 77 | (45.9, 108.1) | 4 |
| Increase capabilities of onsite manager | 1.11** | 44 | (13.8, 74.2) | 11 | 0.31 | 49 | (9.2, 88.8) | 10 |
| Recognise and celebrate staff achievements | 1.05** | 40 | (12.2, 67.8) | 12 | 0.15 | 40 | (2.8, 77.2) | 11 |
| Ensure more on-Country training for First Nations staff | 1.02** | 38 | (10.2, 65.8) | 13 | -0.22 | 21 | (-15.7, 57.7) | 16 |
| Provide employment to local community members | 1.00** | 37 | (9.1, 64.9) | 14 | -0.33 | 15 | (-18.7, 48.7) | 17 |
| Increase opportunities for promotion and/or advancement | 0.80** | 25 | (-4.1, 54.1) | 15 | -0.46 | 9 | (-29.3, 47.3) | 18 |
| Provide more professional mentoring appropriate to my needs | 0.80** | 25 | (-4.4, 54.4) | 16 | 0.41 | 53 | (18.4, 87.6) | 9 |
| Reduce overtime/on-call demands | 0.74* | 22 | (-11.4, 55.4) | 17 | 0.02* | 33 | (-7.1, 73.1) | 13 |
| Improve HR support, including policies and processes | 0.74* | 21 | (-11.6, 53.6) | 18 | 0.48 | 57 | (24.2, 89.8) | 8 |
| Coordination support for logistics (e.g., groceries) | 0.39 | 0 | (-32.7, 32.7) | 19 | -0.64 | 0 | (-36.7, 36.7) | 19 |
| Support for family employment opportunities (ref) | Reference |  |  |  |  |  |  |  |

** p<.01, * p<.05, CI – confidence intervals, β coeff: β coefficients

### D. Latent class analysis (2 class solution)

Supplementary data Table S10: Relative preferences of attributes and class allocation model for two latent class model

|  | **Latent class 1(n = 100)** | | | **Latent Class 2 (n= 128)** | | |
| --- | --- | --- | --- | --- | --- | --- |
| **Attributes** | **β** **coeff** | **Preference score** | **95% CI** | **β coeff** | **Preference score** | **95% CI** |
| Retention bonus for every 12 months of service | 0.49 | 39.6 | (21.9, 57.3) | 2.73** | 100 | (85.5, 114.5) |
| Increase my salary/income (e.g., $5,000 extra) | -0.81* | 0 | (-21.3, 21.3) | 2.46** | 91.8 | (76.3, 106.5) |
| Offer annual leave and flexible time-off (e.g., emergencies) | 0.47 | 38.2 | (21.5, 54.9) | 2.42** | 91.3 | (76, 106.7) |
| Subsidies for living costs (housing, school, airfares etc.) | -0.58 | 7.6 | (-14.3, 29.5) | 2.01** | 79.9 | (65.4, 94.2.) |
| Support for training, higher education or research | 1.25** | 58.2 | (43, 73.4) | 1.46** | 64.2 | (49.5, 78.9) |
| Better rostering and support to allow staff rotation | 0.82* | 46.2 | (30, 63.7) | 1.25** | 58.2 | (42.7, 73.3) |
| Increase support networks and wellbeing engagement | 1.38** | 61.9 | (46.9, 77) | 1.16** | 55.8 | (40.8, 70.7) |
| Increase training and mentoring by local First Nations people | 1.48** | 64.7 | (49.6, 79.7) | 0.95** | 49.7 | (34.8, 64.6) |
| Improve role recognition and clarity | 0.52 | 39.4 | (21.3, 57.5) | 0.80** | 45.7 | (30.1, 61.6) |
| Provide more professional mentoring appropriate to my needs | 0.44 | 36.6 | (20.4, 52.8) | 0.79** | 45.4 | (30.6,60.2) |
| Improve HR support, including policies and processes | 0.63* | 40.8 | (26.4, 57.2) | 0.6* | 39.9 | (23.3, 56.5) |
| Coordination support for logistics (e.g., groceries) | -0.57 | 8.3 | (-13.9, 30.5) | 0.40 | 34.3 | (19.2, 49.5) |
| Recognise and celebrate staff achievements | 1.03** | 52 | (37, 67) | 0.38 | 33.6 | (17.9, 48.9) |
| Increase capabilities of onsite manager | 1.14** | 55.2 | (40, 70.6) | 0.34 | 32.7 | (14.7, 49.6) |
| Reduce overtime/on-call demands | 0.61* | 40.3 | (23.5, 57.5) | 0.28 | 30.9 | (11.5, 49.8) |
| Increase opportunities for promotion and/or advancement | 0.51 | 38.3 | (22.9, 53.7) | 0.27 | 30.5 | (13.7, 46.9) |
| Increase First Nations leadership | 1.71** | 71.3 | (56, 86.5) | 0.23 | 29.6 | (13.5, 45.1) |
| Provide employment to local community members | 0.88** | 47.9 | (33.3, 63.7) | 0.17 | 27.7 | (11.9, 43.1) |
| Ensure more on-Country training for First Nations staff | 1.02** | 52 | (36.7, 67.1) | 0.13 | 26.6 | (10.4, 43.2) |
| Support for family employment opportunity | Reference | | | Reference | | |
| Class allocation type | Latent class 1 | | | Latent Class 2 | | |
|  | **β** **coeff** | | |  | | |
| Type of employment (ref - casual/locum/other) | -0.49 | | | Reference | | |
| Years of experience in remote health | 0.30 | | | Reference | | |
| Location (ref-small town less 1,000 population) | -0.54 | | | Reference | | |
| ATSICCHOs (ref – other non-community-controlled health services) | 0.44 | | | Reference | | |
| Average class probability | 0.44 | | | 0.56 | | |
| Note: ** p<.01 (Significant less than 1%), * p<.05 (Significant less than 5%), CI- confidence intervals, β coeff: β coefficients | | | | | | | |

Note: Model fit indicators:- Two groups model (Likelihood ratio test (LRT): -2844.704(lowest), Bayesian information criterion (BIC): 6045.018 (lowest), Akaike information criterion (AIC): 5767.407; Three groups model (Likelihood ratio test (LRT): -2773.937 , Bayesian information criterion (BIC): 6085.85, Akaike information criterion (AIC): 5665.875; Four groups model (Likelihood ratio test (LRT): -2715.877, Bayesian information criterion (BIC): 6152.094, Akaike information criterion (AIC): 5589.754.

**References**

1. Buykx P, Humphreys J, Wakerman J, Pashen D. Systematic review of effective retention incentives for health workers in rural and remote areas: Towards evidence‐based policy. Aust J Rural Health (2010) **18**(3):102-109.

2. Dolea C, Stormont L, Braichet J-M. Evaluated strategies to increase attraction and retention of health workers in remote and rural areas. Bull World Health Organ (2010) **88**(5):379-385.

3. Humphreys JS, Jones JA, Jones MP, Mara PR. Workforce retention in rural and remote Australia: determining the factors that influence length of practice. Med J Aust (2002) **176**(10):472-476.

4. Li J, Scott A, McGrail M, Humphreys J, Witt J. Retaining rural doctors: doctors' preferences for rural medical workforce incentives. Soc Sci Med (2014) **121**:56-64.

5. World Health Organisation (WHO). WHO guideline on health workforce development, attraction, recruitment and retention in rural and remote areas. World Health Organization; 2021. ISBN: 9240024220.

6. Russell DJ, Zhao Y, Guthridge S, Ramjan M, Jones MP, Humphreys JS, Wakerman J. Patterns of resident health workforce turnover and retention in remote communities of the Northern Territory of Australia, 2013–2015. Hum Resour Health (2017) **15**(1):52. doi:10.1186/s12960-017-0229-9.

7. Russell D, Mathew S, Fitts M, Liddle Z, Murakami-Gold L, Campbell N, et al. Interventions for health workforce retention in rural and remote areas: a systematic review. Hum Resour Health (2021) **19**(1):103.

8. Wakerman J, Humphreys J, Russell D, Guthridge S, Bourke L, Dunbar T, et al. Remote health workforce turnover and retention: what are the policy and practice priorities? Hum Resour Health (2019) **17**(1):99. doi:10.1186/s12960-019-0432-y.

9. Veginadu P, Mathew S, Humphreys JS, Wakerman J, DeMasi K, Ramjan M, et al. Health workforce retention in remote Aboriginal and Torres Strait Islander communities in high income countries: a rapid realist review. Human Resources for Health (Under review) (2026).

10. Mühlbacher AC, Kaczynski A, Zweifel P, Johnson FR. Experimental measurement of preferences in health and healthcare using best-worst scaling: an overview. Health Economics Review (2016) **6**(1):2. doi:10.1186/s13561-015-0079-x.
